# Supplementary material for: A dual strain probiotic administered via the waterline beneficially modulates the ileal and cecal microbiome, sIgA and acute phase protein levels, and growth performance of broilers during a dysbacteriosis challenge
Source: PubMed Central journal article supplement — Poult Sci. 2024 Oct 30;103(12):104462. doi: 10.1016/j.psj.2024.104462 (PMC11577228; doi:10.1016/j.psj.2024.104462), 2024-10-30
Supplement: mmc1.pdf [file mmc1.pdf]

**Minutes of the Meeting  
Institutional Animal Ethics Committee  
Agrivet Research & Advisory Pvt Ltd.**

The meeting of IAEC of Agrivet Research & Advisory Pvt Ltd is held on 28<sup>th</sup> March 2023 at the research centre in Vill: Jhampa, P.O. Kaliani, P.S. Deganga, N 24 Parganas, West Bengal - 743423

**The following inhouse members were present:**

Dr. Sudipto Halder, Director - Agrivet Research & Advisory Pvt Ltd  
Dr. Amrita Kumar Dhara, Director - Agrivet Research & Advisory Pvt Ltd  
Dr. Sayantani Sihi Arora, Chief scientific officer – Agrivet Research & Advisory Pvt Ltd  
Dr. Anirvid Sarkar, Director – Agrivet Research & Advisory Pvt Ltd.  
Mr. Arup Nayak, Manager – Research Laboratory - Agrivet Research & Advisory Pvt Ltd

**The following member were present from the outside of the establishment:**

Dr. Shaktipada Pradhan – Dept. of Veterinary Pathology, W.B.U.A.F.S

The chairman welcomed all members and started the meeting by describing the agendas.

The resolutions/recommendations of the committee are as follows:

1. Dr Sayantani Sihi Arora has presented the protocol and Form B of the below mentioned upcoming trial  
Evaluation of efficacy of a water administered probiotic and dietary Enviva EO on broiler performance.
2. The below mentioned protocols have been approved by the IAEC of Agrivet Research & Advisory Pvt. Ltd.

| Sl No. | Study Title                                                                                            | No.                  |
|--------|--------------------------------------------------------------------------------------------------------|----------------------|
| 1.     | Evaluation of efficacy of a water administered probiotic and dietary Enviva EO on broiler performance. | ARAPL/IAEC/001/23-24 |

The meeting ended with a vote of thanks to the Chairman.

|                                                                                          |                                                                                                    |
|------------------------------------------------------------------------------------------|----------------------------------------------------------------------------------------------------|
| Dr Sudipto Haldar,<br>Director, Agrivet Research & Advisory Pvt Ltd                      | 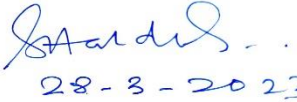<br>28-3-2023    |
| Dr Amrita Kumar Dhara<br>Director, Agrivet Research & Advisory Pvt Ltd                   | <br>28/3/2023    |
| Dr Sayantani Sihi Arora<br>Chief Scientific Officer, Agrivet Research & Advisory Pvt Ltd | <br>28/03/23     |
| Dr Anirvid Sarkar<br>Director, Agrivet Research & Advisory Pvt Ltd                       | <br>28/03/23     |
| Mr. Arup Nayak<br>Manager – Research Laboratory - Agrivet Research & Advisory Pvt Ltd    | <br>28/03/23    |
| Dr. Shaktipada Pradhan<br>Dept. of Veterinary Pathology, W.B.U.A.F.S                     | <br>28/03/2023 |
